# Supplementary material for: The influence of spinodal decomposition-based phase separation in a hybrid polymer hole transport layer on electroluminescent quantum dot light-emitting diodes
Source: Royal Society of Chemistry journal article supplement (doi:10.1039/d3tc01543b), 2023-01-01
Supplement: d3tc01543b1.pdf [file d3tc01543b1.pdf]

Electronic Supplementary Information

## Influence of Spinodal Decomposition-based Phase Separation in Hybrid Polymer Hole Transport Layer on Electroluminescent Quantum Dot Light-Emitting Diodes

Minh-Son Hoang,<sup>a†</sup> Jie-Syuan Lu,<sup>a†</sup> Her-Yih Shieh,<sup>a</sup> and Hsueh-Shih Chen<sup>a,b,c\*</sup>

<sup>a</sup> Department of Materials Science and Engineering, National Tsing Hua University, Hsinchu 30013, Taiwan.

<sup>b</sup> College of Semiconductor Research, National Tsing Hua University, Hsinchu 30013, Taiwan.

<sup>c</sup> Department of Chemical Engineering & Materials Science, College of Engineering, Yuan Ze University, Taoyuan 32003, Taiwan.

<sup>†</sup> M.-S. H and J.-S. L. contributed equally to this study

\* Contact author: chenhs@mx.nthu.edu.tw

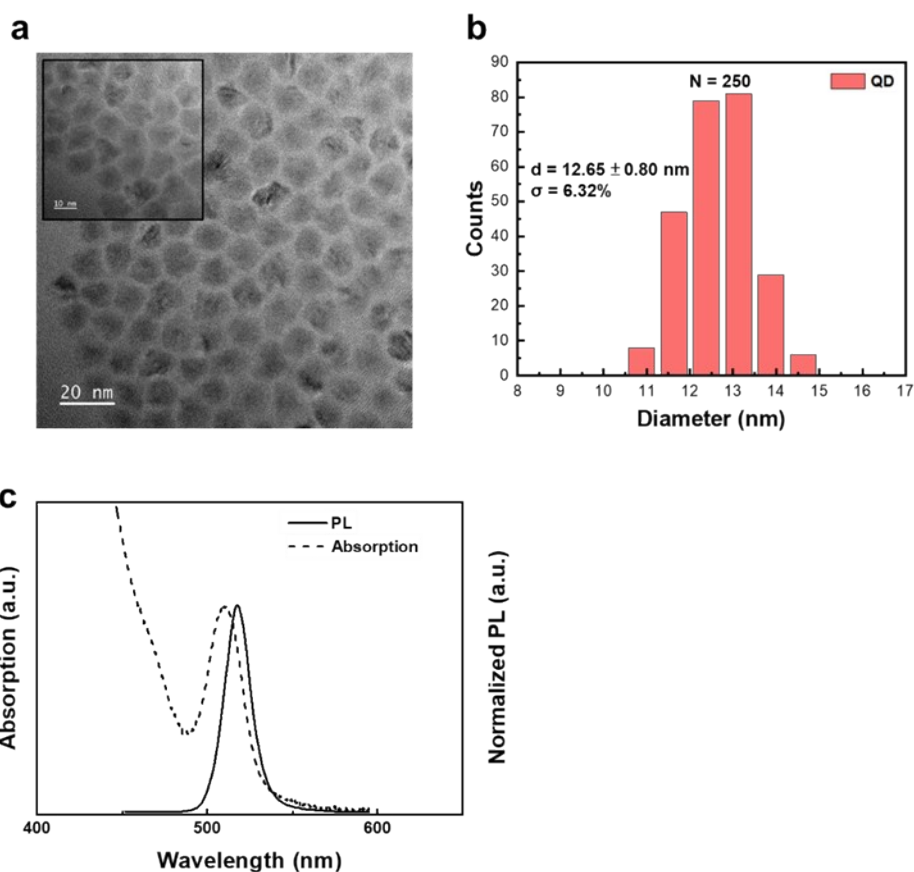

**Fig. S1** (a) TEM image, (b) size distribution and Optical absorption and PL spectra of as-obtained green QDs. The non-spherical QDs are alloy ZnCdSeS with protrudes passivating the crystal facets predominately at (111) and (220).

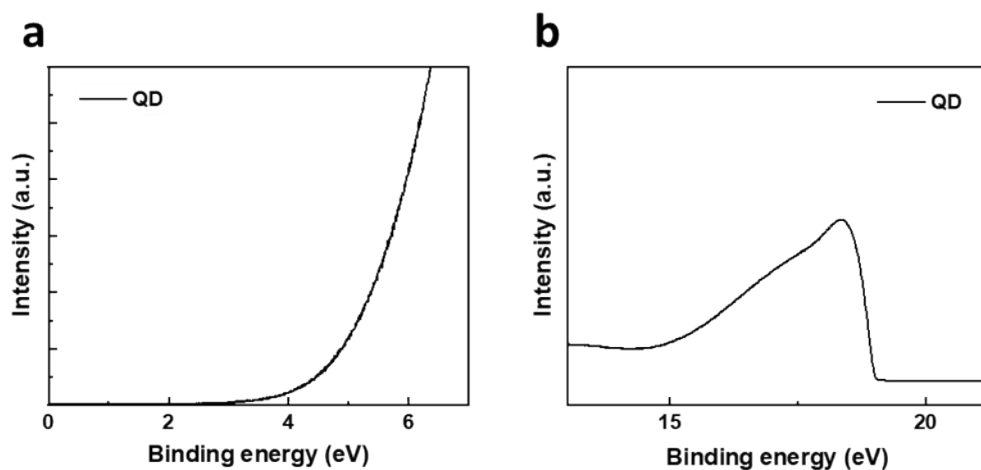

**Fig. S2** UPS spectra of green QDs. (a) Onset region in valence-band region and (b) the secondary cut off region.

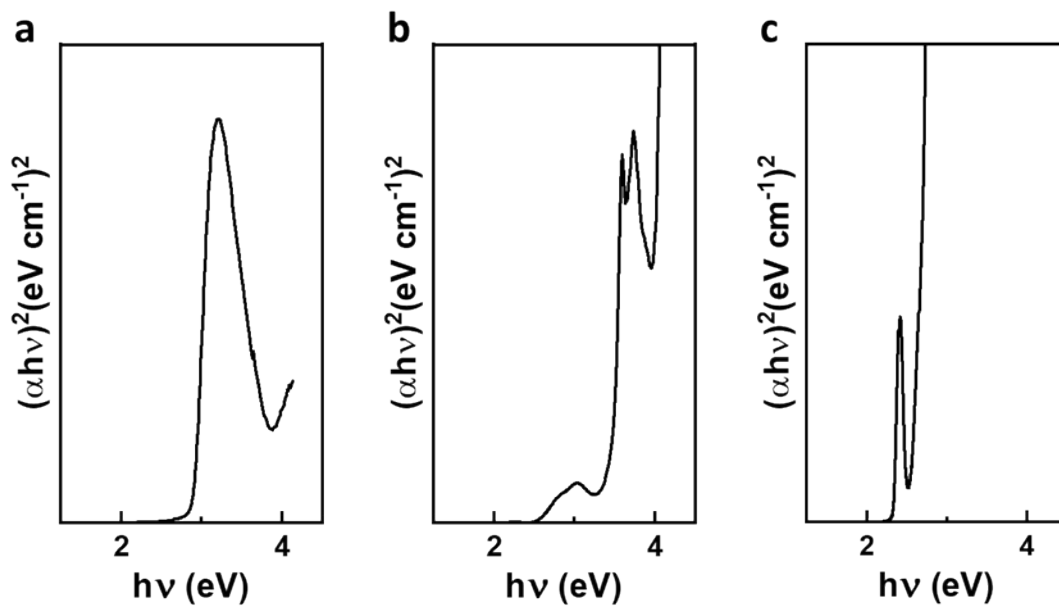

Fig. S3 Tauc plot of (a) TFB (b) PVK and (c) green QD.

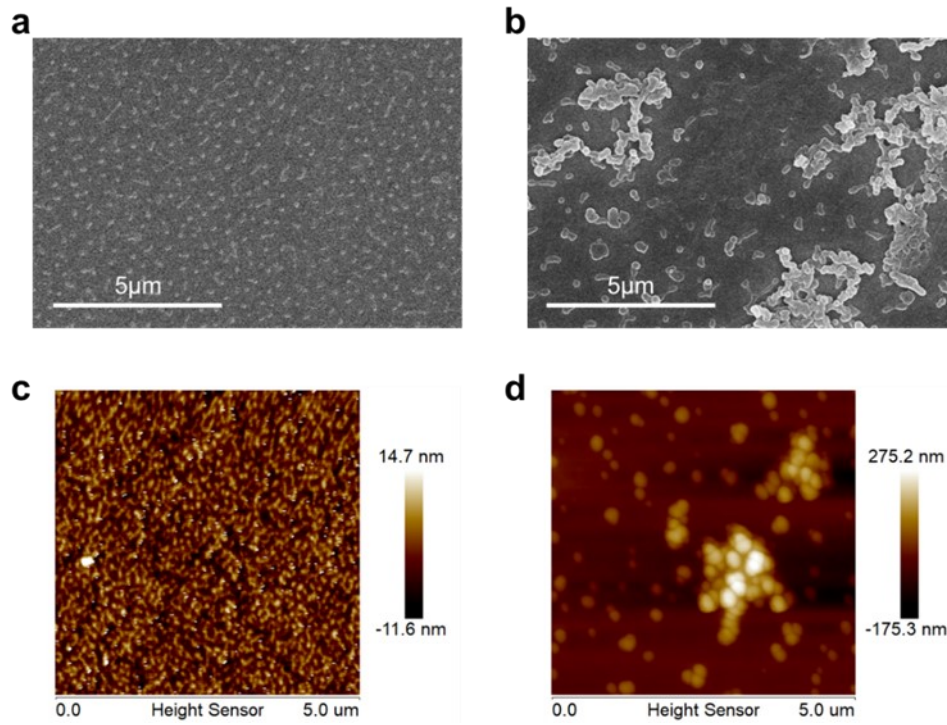

Fig. S4 SEM image of (a) spin-coating 1,4-dioxane on TFB film, (b) spin-coating PVK solution with 1,4-dioxane as solvent on TFB film and cause erosion. AFM image of (c) spin-coating 1,4-dioxane on TFB film, (d) spin-coating PVK solution on TFB and form non-uniform film.

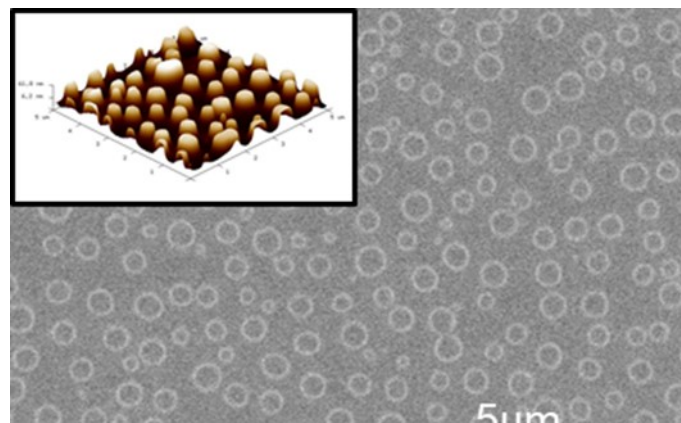

Fig. S5 SEM and AFM images of TFB-50 vol% films on the ITO/PEDOT:PSS substrates.

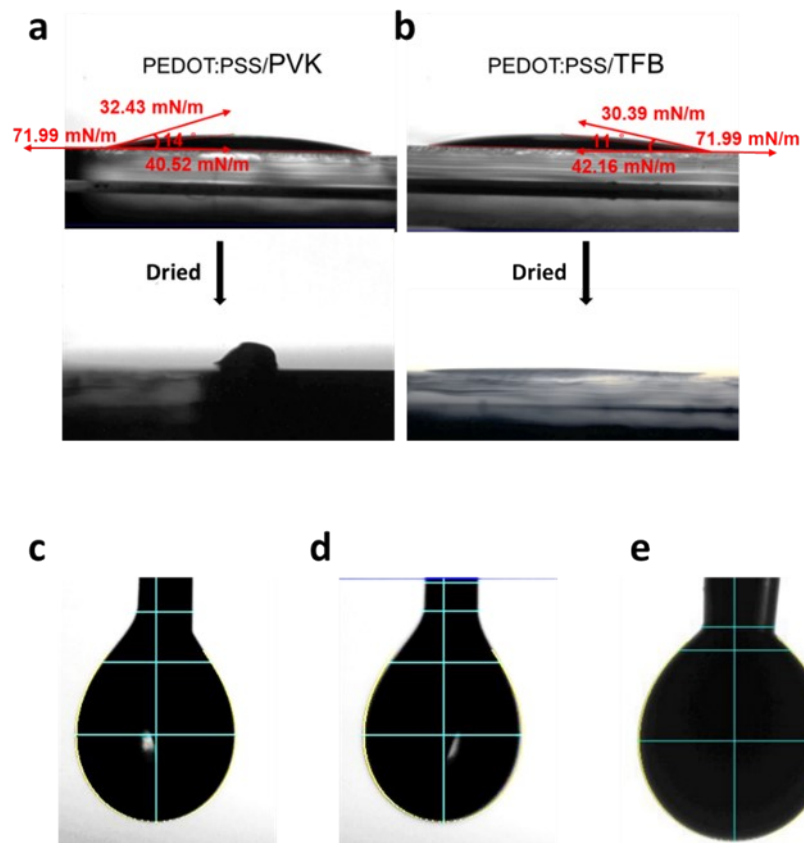

**Fig. S6** Contact angle and surface tension of (a) PVK solution and (b) TFB solution on PEDOT:PSS film. Pendant drop method of (c) PVK droplet, (d) TFB droplet and (e) PEDOT:PSS droplet.

**Table S1.** Surface tension of PEDOT:PSS film, TFB droplet and PVK droplet.

|              | $\cos\theta$ | Surface tension<br>(mN/m) |
|--------------|--------------|---------------------------|
| PEDOT:PSS    | 1            | 71.99                     |
| TFB-25 vol % | 0.927        | 33.39                     |
| TFB-75 vol % | 0.883        | 32.43                     |

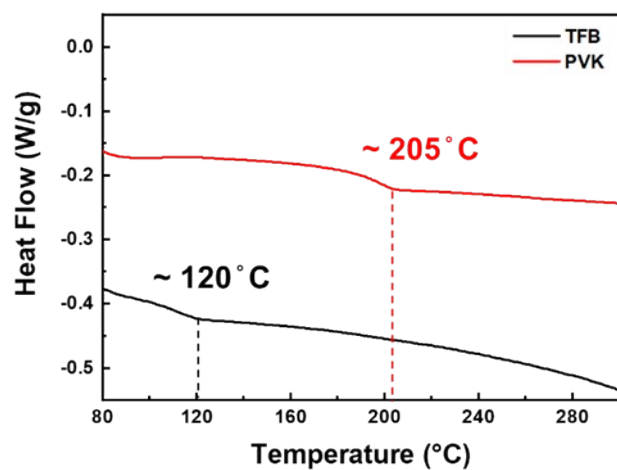

Fig. S7 DSC analysis of PVK and TFB.

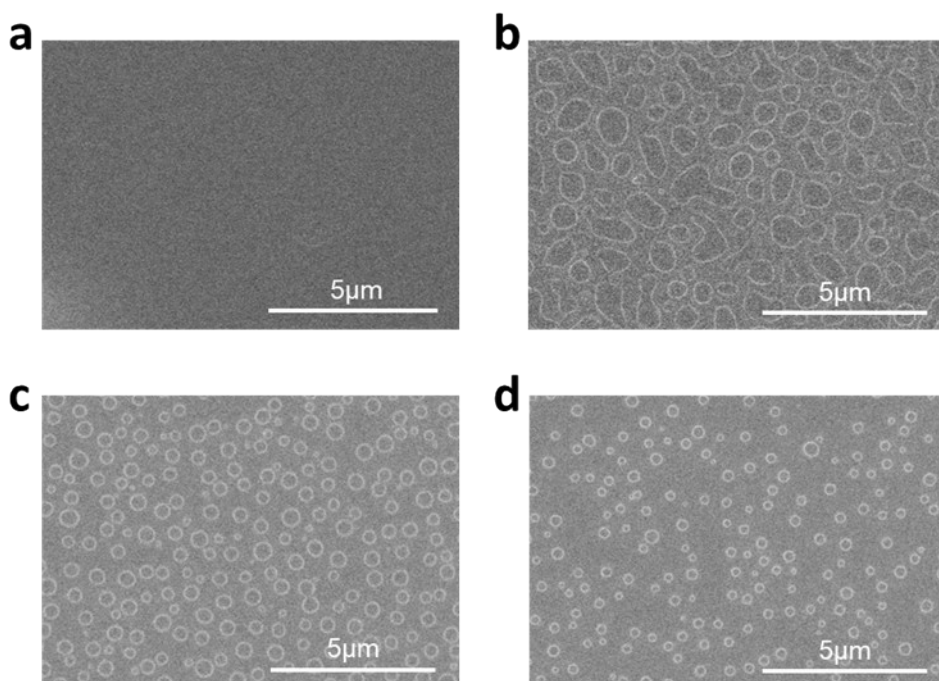

Fig. S8 SEM images of (a) TFB-10 vol%, (b) TFB-25 vol%, (c) TFB-50 vol%, (d) TFB-75 vol% films on the ITO/PEDOT:PSS substrates.

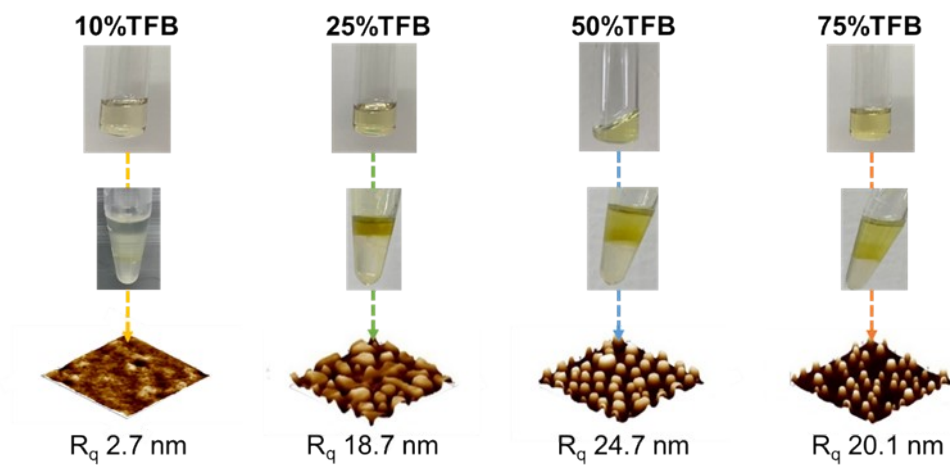

Fig. S9 The path of homogeneous solution to phase separation film in PVK-TFB-Toluene ternary phase diagram.

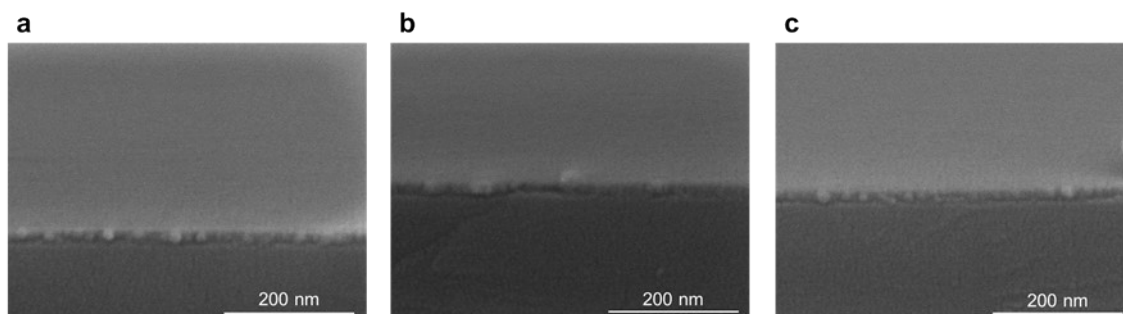

Fig. S10 Cross section SEM images of (a) PVK, (b) TFB and (c) 10% TFB- 90% PVK layers. The thickness of PVK, TFB, and TFB/PVK films are measured to be approximately 30, 27, 29 nm, respectively.

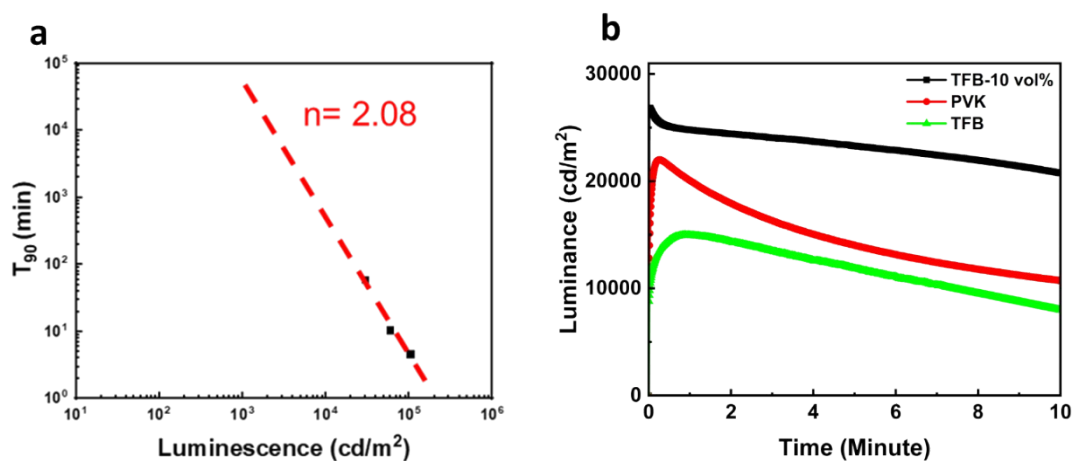

Fig. S11 (a) The acceleration lifetime of QLED (device with hybrid HTL of 10% TFB in PVK), equivalent to 100 nits for 129,374 h. (b) The lifetime of three devices as optimal hybrid HTL, pure PVK and TFB.

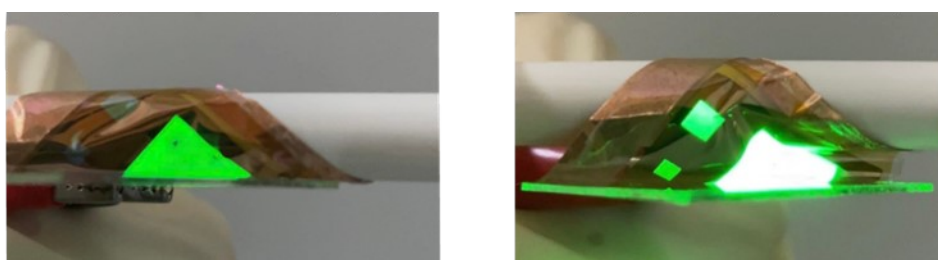

Fig. S12 TFB-PVK hybrid flexible QLED device with (a) and without (b) phase separation upon the bending. In the left photo, the dark spots show non-uniform regions, which are observed in the large area device. The small area EL devices have lower brightness and the non-uniform regions are hardly observed by naked eyes. In the right photo, none of non-uniform regions are observed in both large and small area film by either naked eyes or photos.



Fig. S13 PVK and Hybrid HTL flexible QLED devices. (a) Current density-voltage (J-V) characteristics. (b) Voltage-luminance characteristics. (c) Current efficiency-luminance characteristics. (d) Photo of the flexible devices.

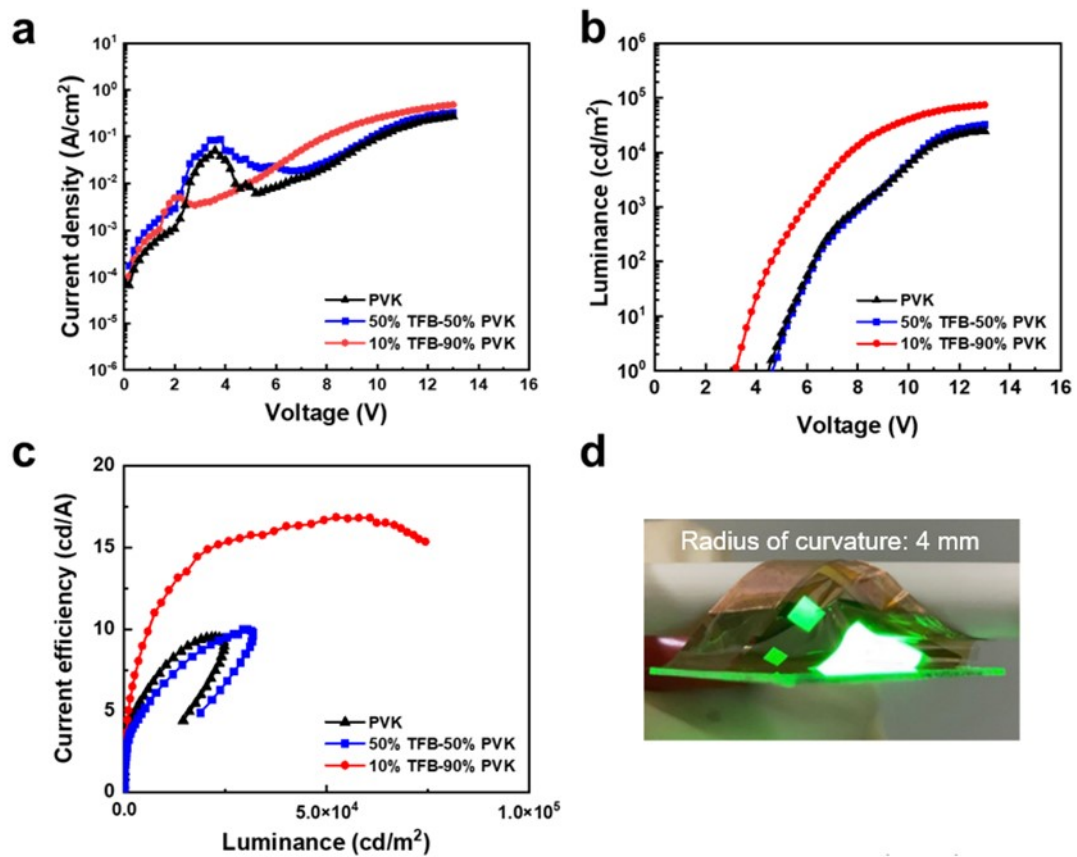



**Table S2.** Comparison of the performance of atmosphere-fabricated QLEDs. (the device with green QDs and all layers fabricated under atmosphere conditions)

| Device structure    | HTL      | Turn-on voltage (V) | Maximal luminance (cd/m <sup>2</sup> ) | Maximal current efficiency (cd/A) | Process condition                                                            | Reference                            |
|---------------------|----------|---------------------|----------------------------------------|-----------------------------------|------------------------------------------------------------------------------|--------------------------------------|
| PEDOT/HTL/QDs/ZnO   | Poly TPD | 6                   | 3050                                   | 2.8                               | Atmospheric fabrication (All layers, except metal cathode)                   | Adv. Optical Mater. 2020, 8, 1901429 |
| PEDOT/HTL/QDs/ZnO   | PVK:TAPC | 3.3                 | 24,800                                 | 26.2                              | Atmospheric fabrication (All layers, except metal cathode)                   | RSC Adv., 2017, 7, 43366-43372       |
| Tandem structure    |          | 6.1                 | 115,500                                | 121.5                             | Atmospheric fabrication (All layers, except Al, HATCN and MoO <sub>3</sub> ) | ACS Nano 2018, 12, 1, 697–704        |
| PEDOT/HTL/QDs/MgZnO | PVK:TFB  | 3.1                 | 276,600                                | 26.8                              | Atmospheric fabrication (All layers, except metal cathode)                   | Our work                             |
